# Supplementary material for: Crmp4 deletion promotes recovery from spinal cord injury by neuroprotection and limited scar formation
Source: PubMed Central journal article supplement (PMC4317684; doi:10.1038/srep08269), 2015-02-05
Supplement: srep08269-s1.pdf [file srep08269-s1.pdf]

## ***Supplementary Information***

“*Crmp4* deletion promotes recovery from spinal cord injury  
by neuroprotection and limited scar formation”

Jun Nagai<sup>1,2</sup>, Yoshiteru Kitamura<sup>1</sup>, Kazuki Owada<sup>1</sup>, Naoya Yamashita<sup>3</sup>, Kohtaro Takei<sup>4</sup>,  
Yoshio Goshima<sup>3</sup> and Toshio Ohshima<sup>1\*</sup>

<sup>1</sup> *Department of Life Science and Medical Bioscience, Graduate School of Advanced  
Science and Engineering, Waseda University, Tokyo, 162-8480 Japan*

<sup>2</sup> *Research Fellow of Japan Society for the Promotion of Science*

<sup>3</sup> *Department of Molecular Pharmacology and Neurobiology, Graduate School of  
Medicine, Yokohama City University, Yokohama 236-0004, Japan*

<sup>4</sup> *Department of Medical Life Science, Graduate School of Medical Life Science,  
Yokohama City University, Yokohama, 236-0004, Japan.*

\* Corresponding author: Toshio Ohshima

Department of Life Science and Medical Bioscience, Waseda University,  
2-2 Wakamatsu-cho Shinjuku-ku, Tokyo 162-8480, Japan

Tel: -81-3-5369-7321, Fax: -81-3-5369-7302, e-mail: [ohshima@waseda.jp](mailto:ohshima@waseda.jp)

Supplementary Fig. S1 Nagai et al.

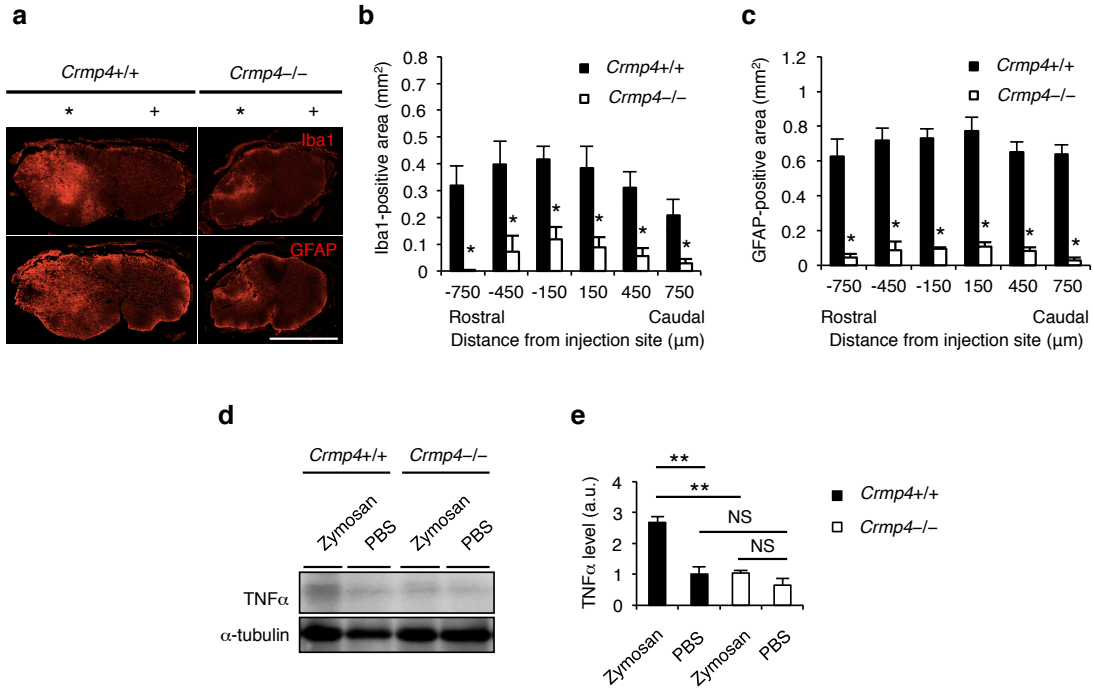

Supplementary Fig. S2 Nagai et al.

**a**

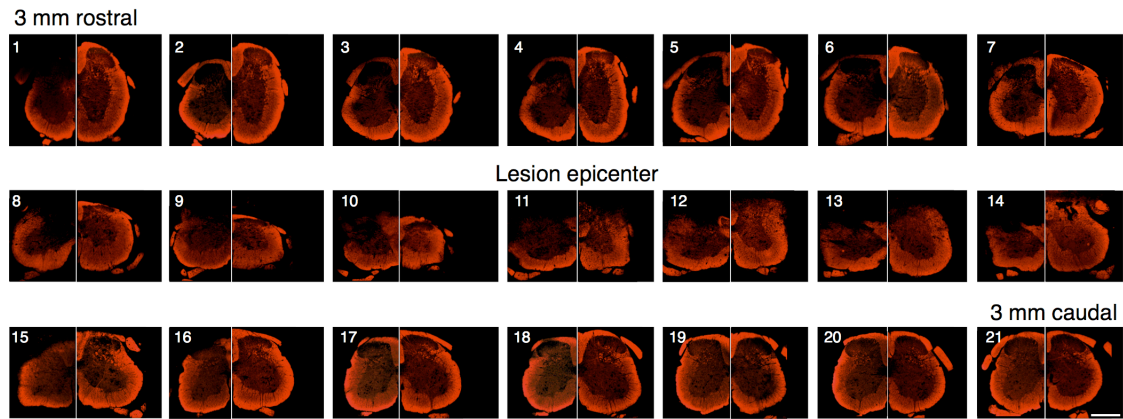

**b**

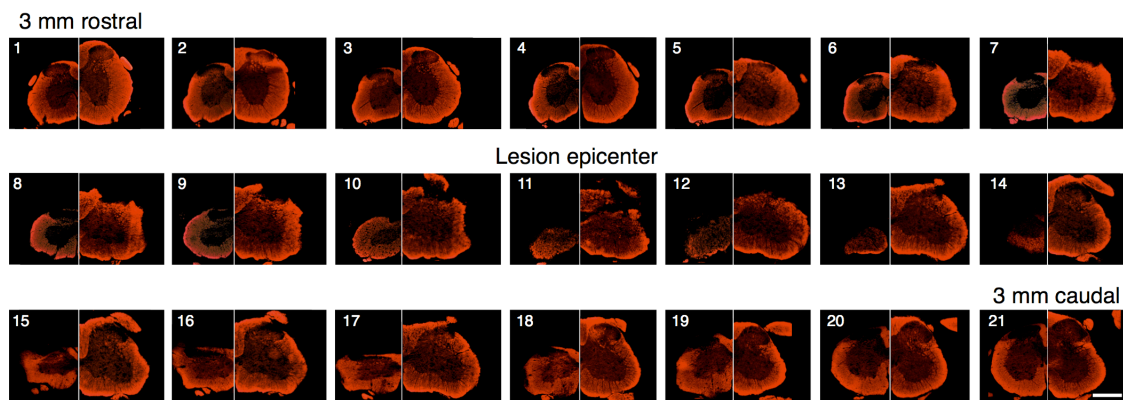

Supplementary Fig. S3 Nagai et al.

**a**

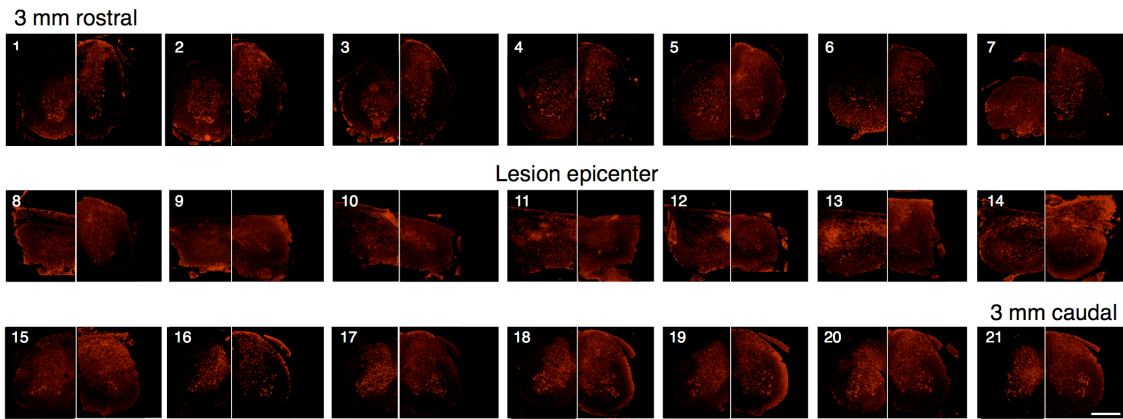

**b**

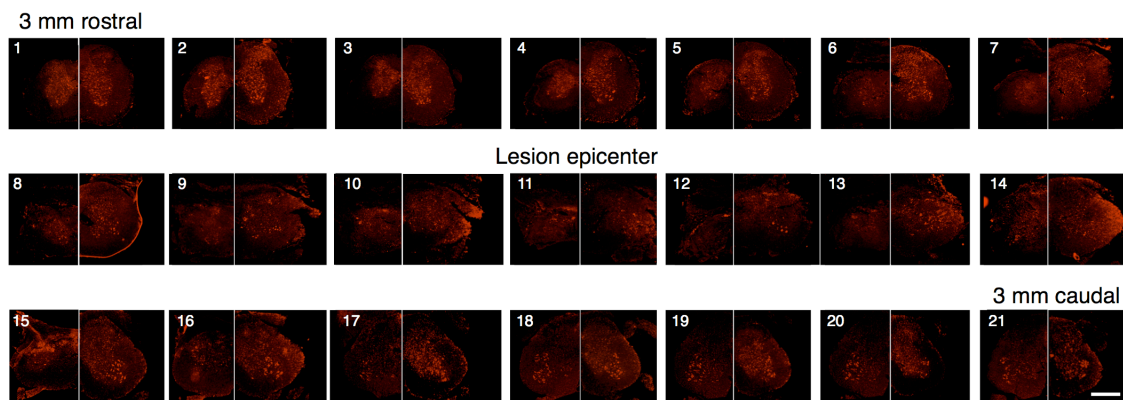

Supplementary Fig. S4 Nagai et al.

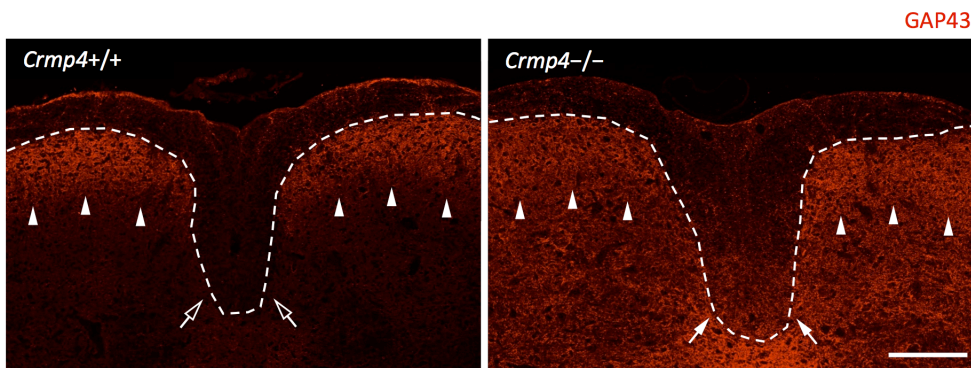

**Supplementary Figure 1. CRMP4 deletion reduces non-traumatic inflammation.**

(a) Representative transverse images of thoracic spinal cords from mice with CRMP4 deletion stained with anti-Iba1 (marker for microglia/macrophages) and anti-GFAP (marker for astrocytes) antibodies at 3 days post induction of non-traumatic inflammation by Zymosan A. \*, Zymosan A injection site; +, PBS injection site. Intraspinal micropipette insertion is confirmed to be non-traumatic by failure of PBS microinjection to activate microglia and astroglia. Scale bars = 1000  $\mu$ m. (b, c) Areas of quantified microglial and astroglial activation in transverse sections taken every 300  $\mu$ m around the injection site. n = 3. \*,  $P < 0.05$  compared with *Crmp4*<sup>+/+</sup> controls. Statistical analysis by unpaired Student's *t* test. (d, e) Western blotting analysis with anti-Tumor necrosis factor alpha antibody after Zymosan A- or buffer-injection of spinal cords (n = 3 animals). \*\*,  $P < 0.01$ . Statistical analysis by one-way ANOVA followed by Tukey's multiple comparison test. Data are mean  $\pm$  S.E.M. PBS, phosphate-buffered saline; TNF $\alpha$ , Tumor necrosis factor alpha; NS, not significant.

**Supplementary Figure 2. Serial cross sections from *Crmp4*<sup>+/+</sup> and *Crmp4*<sup>-/-</sup> mice after SCI with myelin staining.**

Myelin staining of serial cross sections taken every 300  $\mu$ m reveals demyelination through the lesion epicenter (#11). Sections #1–10 are rostral and #12–21 are caudal to the injury site. The left half of each spinal cord section illustrated is from a *Crmp4*<sup>+/+</sup> mouse and the right half is from a *Crmp4*<sup>-/-</sup> mouse. The areas of myelin-positive white matter are not different among samples at 1 week post SCI, indicating that the dorsal transections to the animals were of uniform extent (a). However, at 4 weeks post injury, *Crmp4*<sup>-/-</sup> spinal cord exhibits significantly increased sparing of tissue, including white matter, when compared with control (b). The images of #11 and #14 are shown in Fig. 5d. Scale bar: 500  $\mu$ m.

**Supplementary Figure 3. Serial cross sections from *Crmp4*<sup>+/+</sup> and *Crmp4*<sup>-/-</sup> mice after SCI with Nissl staining.**

Nissl staining of serial cross sections taken every 300  $\mu$ m reveals demyelination through the lesion epicenter (#11). Sections #1–10 are rostral and #12–21 are caudal to the injury site. The left halves of the spinal cord sections are from a *Crmp4*<sup>+/+</sup> mouse and the right halves are from a *Crmp4*<sup>-/-</sup> mouse at 1 week post injury (a) or at 4 weeks post injury (b). The images of #11 and #16 are shown in Fig. 5c. Scale bar: 500  $\mu$ m.

**Supplementary Figure S4. GAP43-immunolabeling in cross sections of injured spinal cords from *Crmp4*<sup>+/+</sup> and *Crmp4*<sup>-/-</sup> mice.** Axonal growth in cross sections at 1.5 mm caudal to lesion site at 4 weeks after injury was detected by immunostaining with anti-GAP43 antibody. Although there was absent of GAP43-positive fibers at the location of descending corticospinal tracts in a control spinal cord (open arrows), GAP43 signals were apparent there in a *Crmp4*<sup>-/-</sup> spinal cord (arrows). Ascending fibers from dorsal root ganglion were GAP43-positive in both genotypes (arrowheads). Scale bar: 100  $\mu$ m.

**Supplementary Movie 1. Locomotor recovery after spinal cord injury in mice lacking CRMP4.** Example of a *Crmp4*<sup>+/+</sup> mouse demonstrating inability to move with hindlimbs and a *Crmp4*<sup>-/-</sup> mouse bearing its body weight at 4 weeks after spinal cord injury.
